# Supplementary material for: Natural and Synthetic Polymer Scaffolds Comprising Upconversion Nanoparticles as a Bioimaging Platform for Tissue Engineering
Source: MDPI journal article supplement (doi:10.3390/molecules27196547), 2022-10-03
Supplement: s1 [file s1]

# Natural and synthetic polymer scaffolds comprising upconversion nanoparticles as a bioimaging platform for tissue engineering

Ekaterina M. Trifanova<sup>1</sup>, Maria A. Khvorostina<sup>1</sup>, Aleksandra O. Mariyanats<sup>1</sup>, Anastasia V. Sochilina<sup>1</sup>, Maria E. Nikolaeva<sup>2</sup>, Evgeniy V. Khaydukov<sup>1</sup>, Roman A. Akasov<sup>1\*</sup> and Vladimir K. Popov<sup>1</sup>.

<sup>1</sup> Institute of Photon Technologies of Federal Scientific Research Centre "Crystallography and Photonics" of Russian Academy of Sciences, Moscow, Russia;

<sup>2</sup> NPF Syntol, Moscow, Russia.

\* Correspondence: roman.akasov@gmail.com

## Appendix A

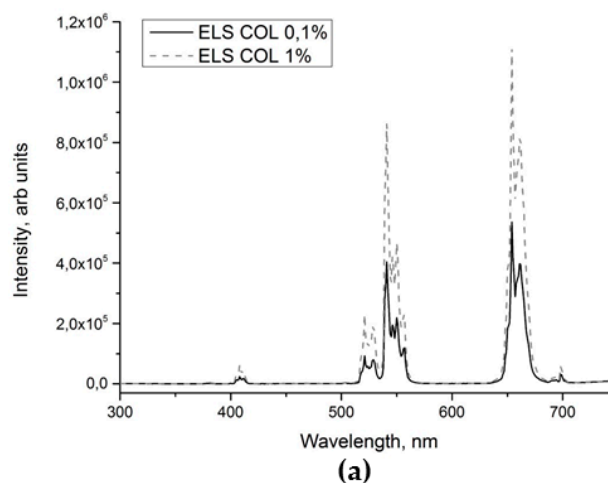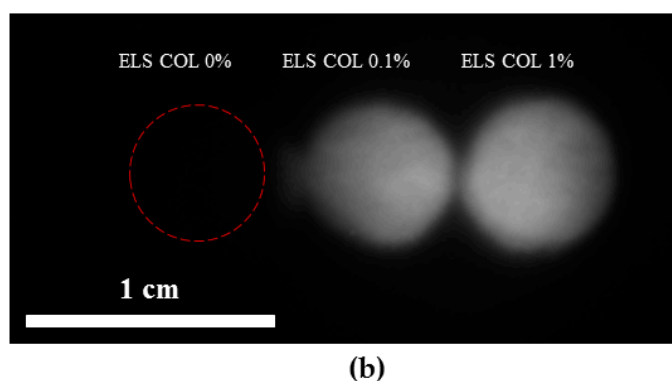

Figure S1. Electrospun collagen scaffolds characterization: normalized photoluminescence spectra of the 0.1 and 1 mg of UCNPs per 100 mg of polymer included in ELS COL scaffolds (a); photograph of ELS COL scaffolds with 0 (control), 0.1 and, 1 mg of UCNPs per 100 mg of polymer at 976 nm (b).

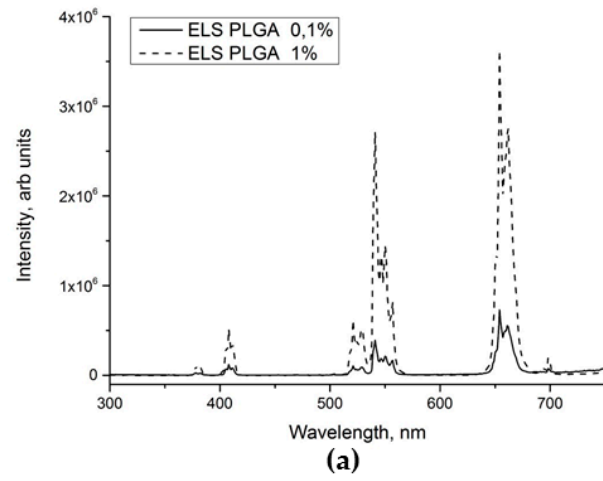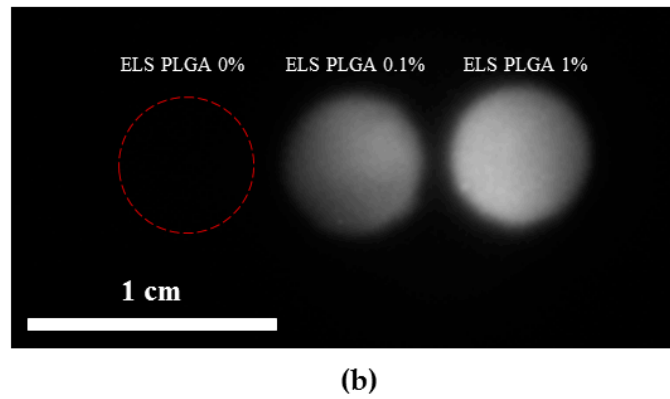

Figure S2. Electrospun polylactic-co-glycolic acids scaffolds characterization: normalized photoluminescence spectra of the 0.1 and 1 mg of UCNP per 100 mg of polymer included in ELS PLGA scaffolds **(a)**; photograph of ELS PLGA scaffolds with 0 (control), 0.1 and, 1 mg of UCNP per 100 mg of polymer at 976 nm **(b)**.

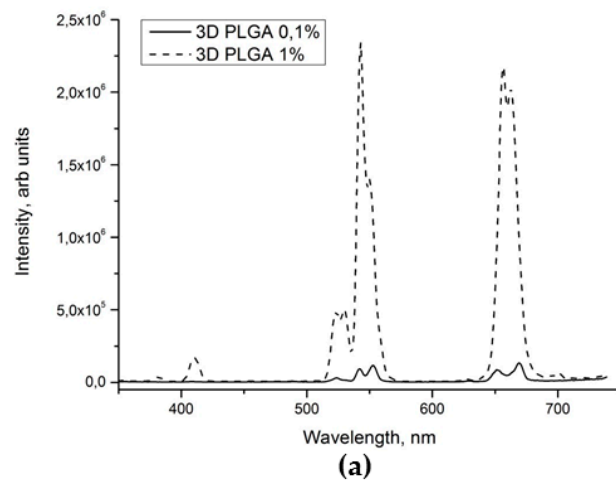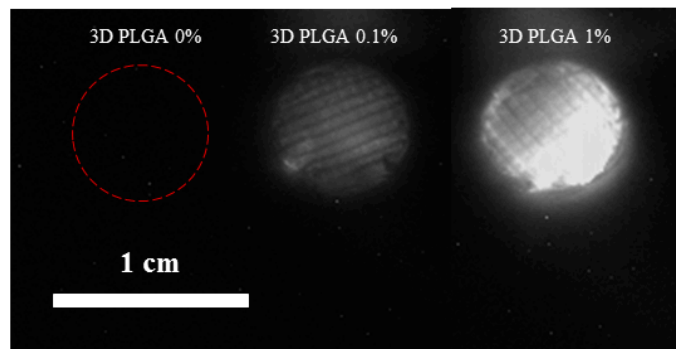

Figure S3. 3D printed polylactic-co-glycolic acids scaffolds characterization: normalized photoluminescence spectra of the 0.1 and 1 mg of UCNPs per 100 mg of polymer included in 3D PLGA scaffolds (a); photograph of 3D PLGA scaffolds with 0 (control), 0.1, and 1 mg of UCNPs per 100 mg of polymer at 976 nm (b).

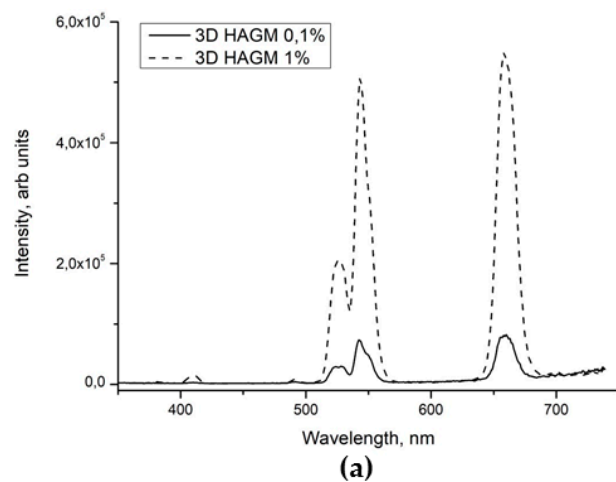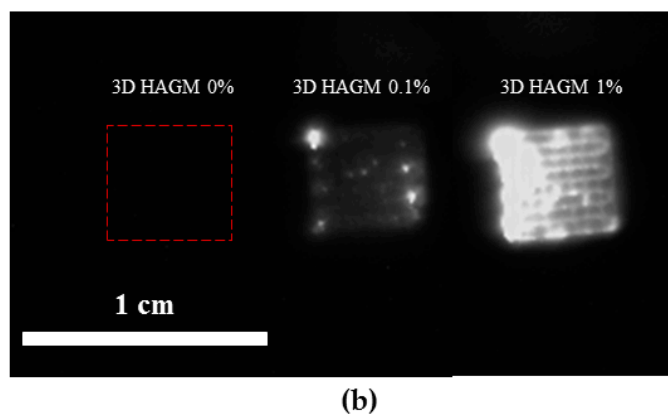

Figure S4. 3D printed HAGM scaffolds characterization: normalized photoluminescence spectra of the 0.1 and 1 mg of UCNPs per 100 mg of polymer included in 3D HAGM scaffolds (a); photograph of 3D HAGM scaffolds with 0 (control), 0.1, and 1 mg of UCNPs per 100 mg of polymer at 976 nm (b).

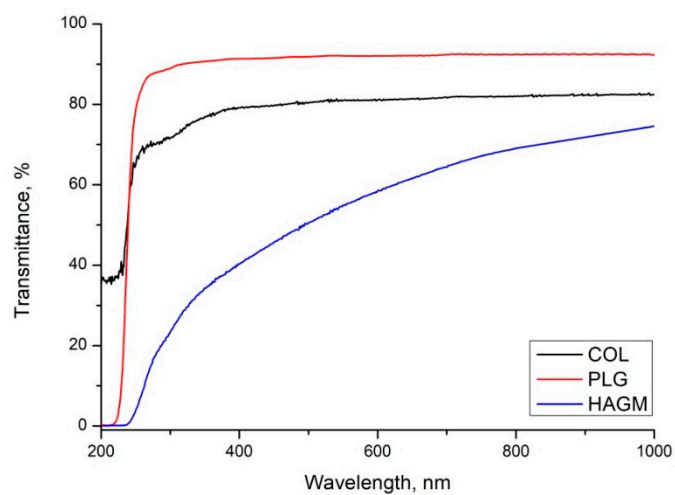

Figure S5. Dependence of transmittance of the polymer films.

Table S1. Lifetime of photoluminescence of UCNPs.

| Wavelength,<br>nm | Photoluminescence lifetime, ms |                   |                     |                      |                     |                     |
|-------------------|--------------------------------|-------------------|---------------------|----------------------|---------------------|---------------------|
|                   | UCNPs                          | UCNPs in<br>water | UCNPs in<br>ELS COL | UCNPs in<br>ELS PLGA | UCNPs in 3D<br>PLGA | UCNPs in 3D<br>HAGM |
| 409               | $0.21 \pm 0.01$                | $0.19 \pm 0.01$   | $0.15 \pm 0.01$     | $0.14 \pm 0.01$      | $0.20 \pm 0.01$     | $0.13 \pm 0.01$     |
| 525               | $0.32 \pm 0.02$                | $0.22 \pm 0.02$   | $0.22 \pm 0.02$     | $0.18 \pm 0.02$      | $0.24 \pm 0.02$     | $0.17 \pm 0.01$     |
| 544               | $0.38 \pm 0.01$                | $0.23 \pm 0.03$   | $0.24 \pm 0.02$     | $0.22 \pm 0.02$      | $0.31 \pm 0.02$     | $0.25 \pm 0.02$     |
| 658               | $0.33 \pm 0.01$                | $0.31 \pm 0.02$   | $0.32 \pm 0.01$     | $0.31 \pm 0.03$      | $0.35 \pm 0.03$     | $0.25 \pm 0.02$     |

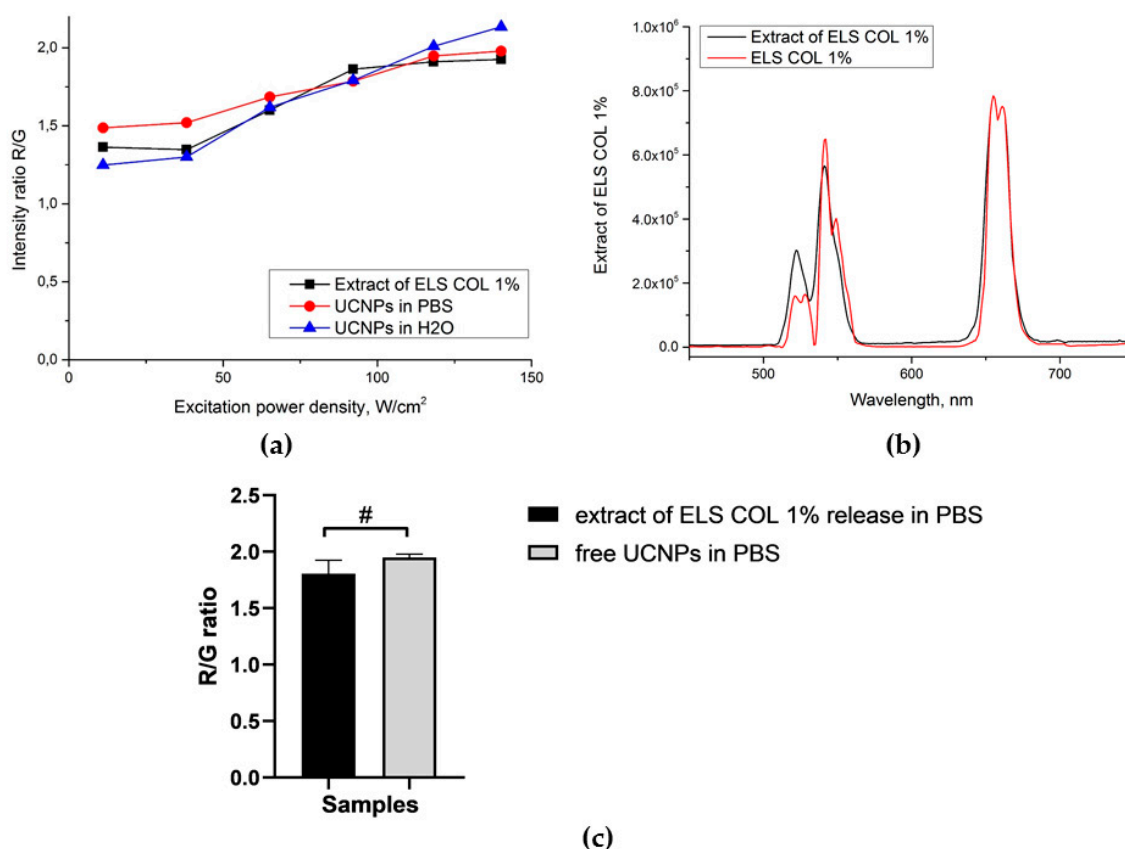

Figure S6. Characterization of upconversion core/shell  $\beta$ -NaYF<sub>4</sub>:Yb<sup>3+</sup>:Er<sup>3+</sup> (NaYF<sub>4</sub>:Yb<sup>3+</sup>) nanoparticles in aqueous media: Dependence of the ratio of the intensity of the red luminescence band at a wavelength of 658 nm to that of the green one at a wavelength of 544 nm on the power density of exciting laser radiation for UCNPs in different media (a); normalized photoluminescence spectra of the UCNPs and the UCNPs included in ELS COL scaffolds (b); Ratio of the intensity of the red peak at 658 nm to the intensity of the green one at a wavelength of 544 nm of 1% UCNPs and UCNPs released from ELS COL scaffolds into PBS (c).

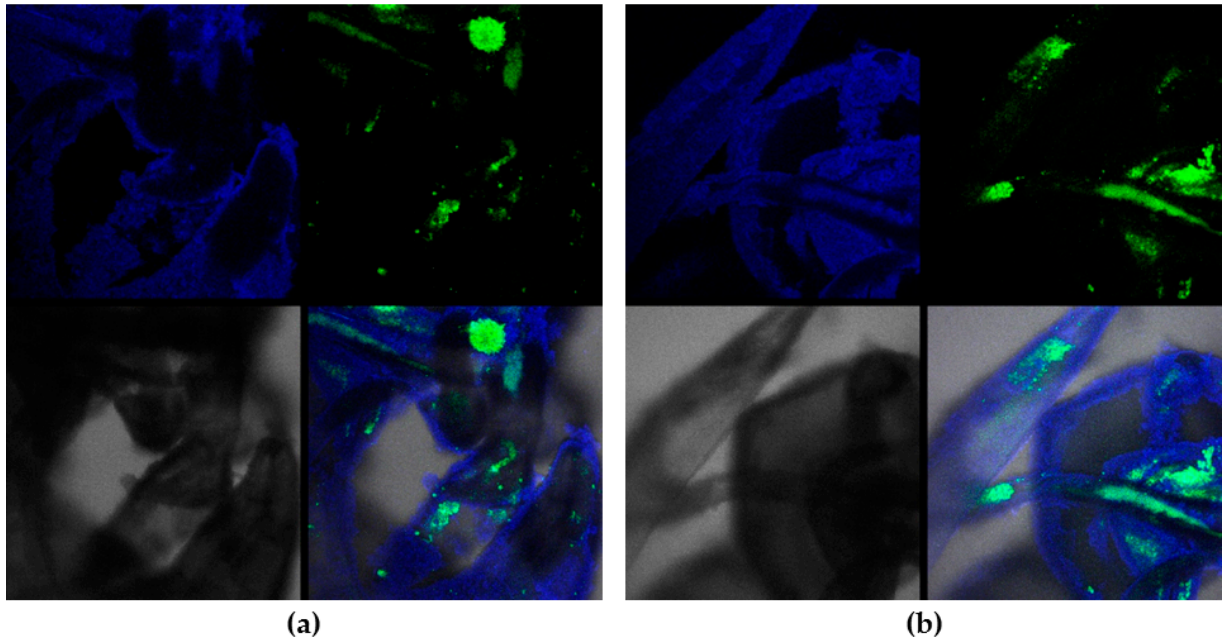

Figure S7. Confocal images of 3D HAGM 0,1% (a) and 3D HAGM 1% (b) scaffolds cultured with Bj-5ta fibroblasts, 8 days incubation. Green is for Calcein AM staining (alive cells), blue is for Hoechst 33342 staining (cell nucleuses).

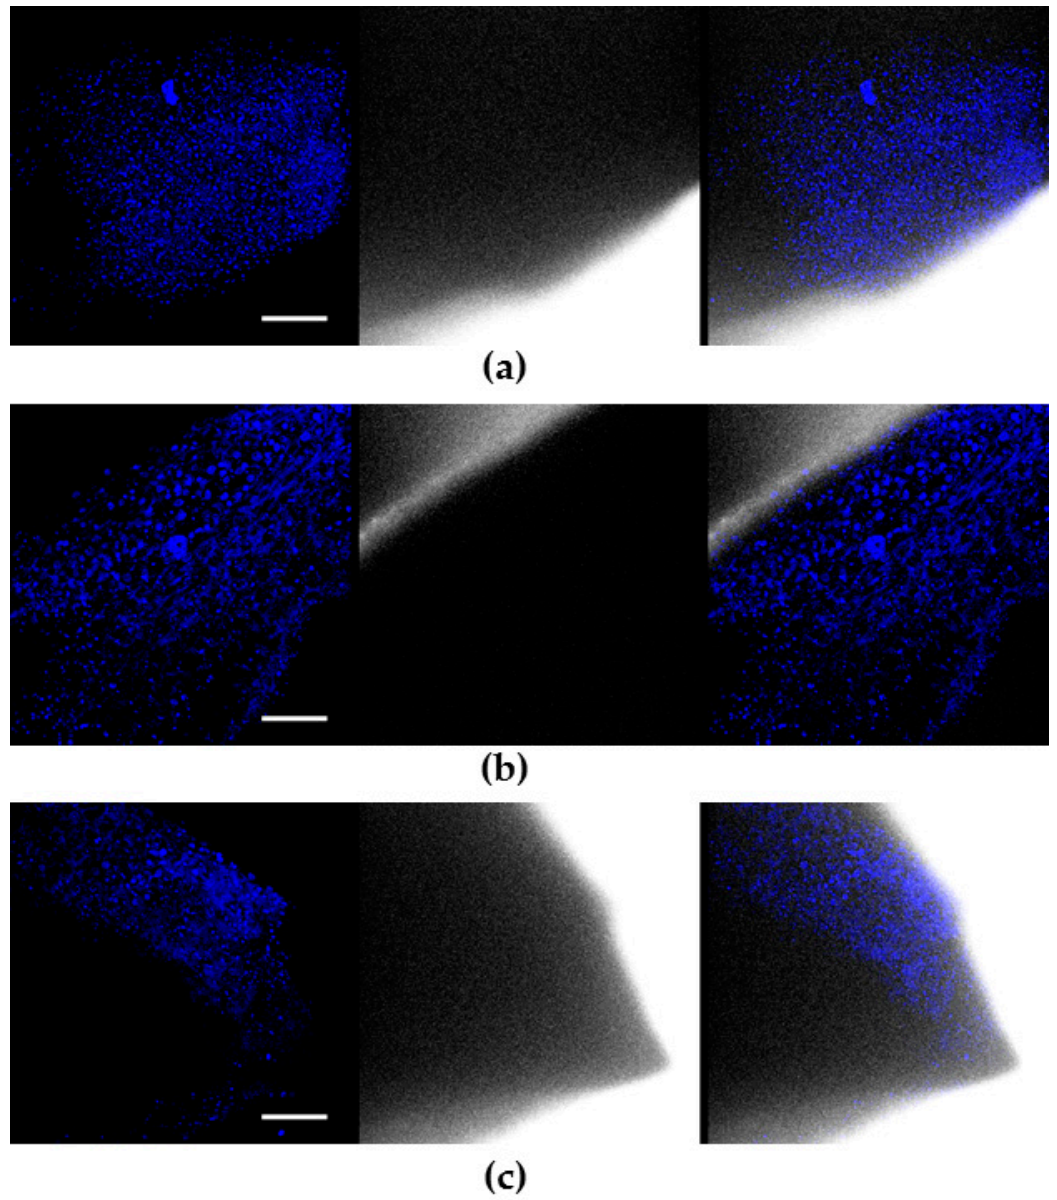

Figure S8. Confocal images of ELS PLG (a), ELS PLG 0,1% (b), and ELS PLG 1% (c) scaffolds cultured with Bj-5ta fibroblasts, 8 days incubation. Blue is for Hoechst 33342 staining (cell nucleuses), no Calcein AM staining. Scale bar is 400  $\mu\text{m}$ .



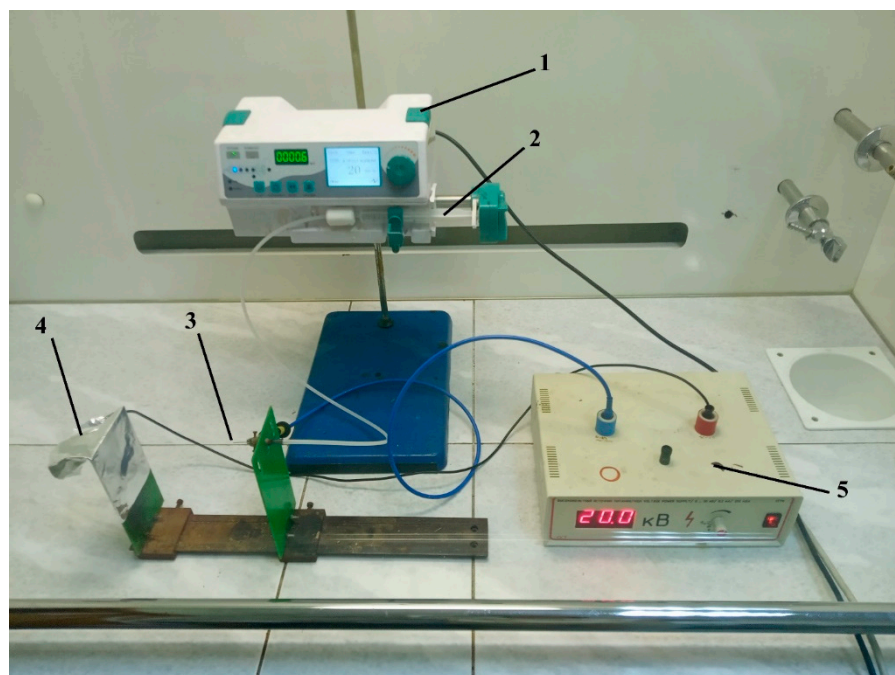

Figure S9. Custom-designed electrospinning set-up. 1 - polymer solution supply system, 2 - syringe, 3 - stainless steel capillary, 4 - aluminum foil collector, 5 - high voltage supply.

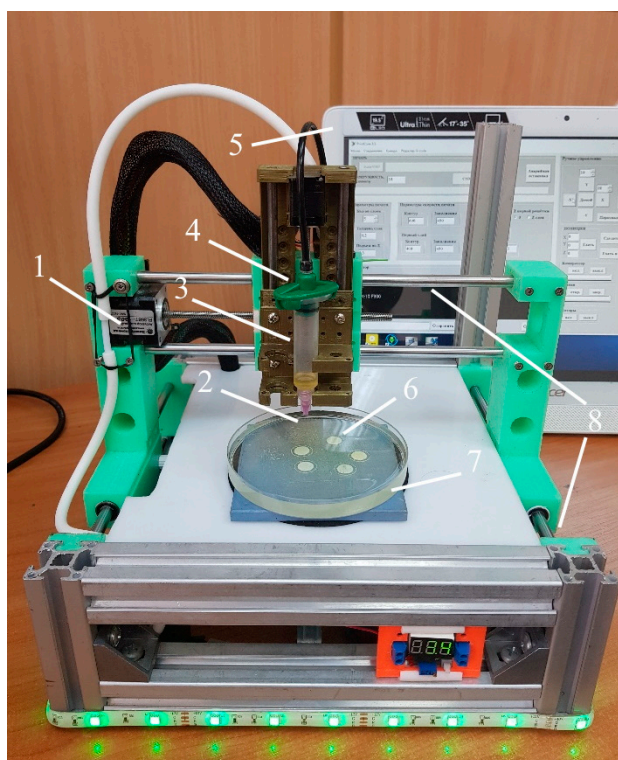

Figure S10. 3D printer for antisolvent printing. 1 - stepper motor, 2 - needle, 3 - syringe, 4 - pump, 5 - PC, 6 - samples, 7 - Petri dish, 8 - motor guides.



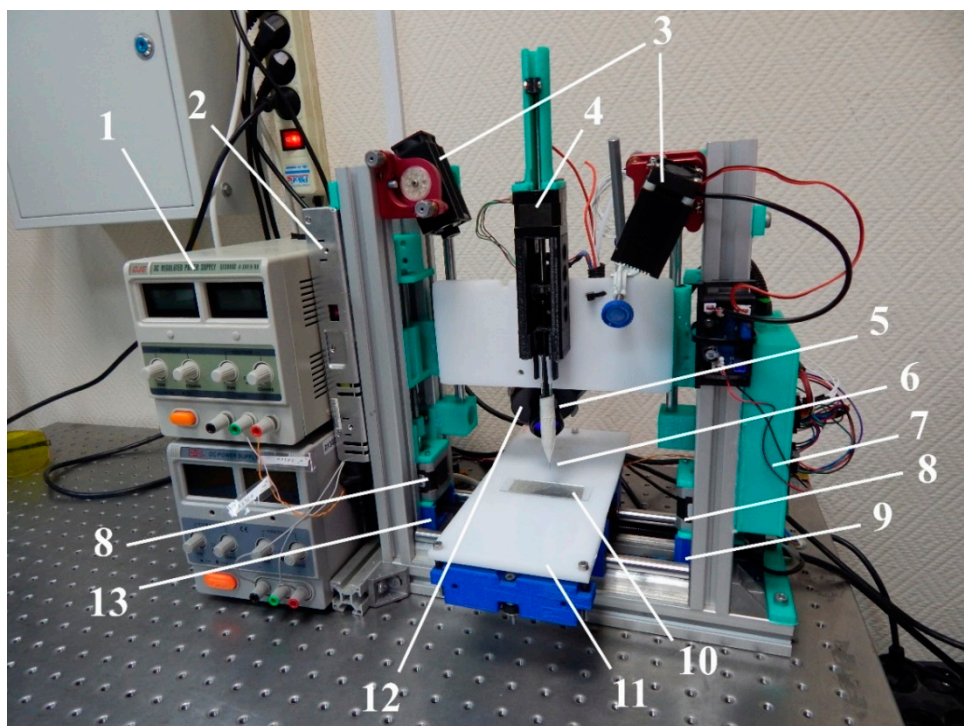

Figure S11. Extrusion 3D printer with laser sources at a wavelength of 445 nm. 1 - power supply for laser modules, 2 - printer power supply, 3 - semiconductor lasers, 4 - stepper motor (for moving the extruder piston), 5 - extruder, 6 - extruder nozzle, 7 - Arduino controller, 8 - stepper motor (for moving desktop along the Z axis), 9 - stepper motor (to move the extruder along the X axis), 10 - substrate, 11 - worktable, 12 - chamber with a filter, 13 - stepper motor (to move the desktop along the Y axis).
